# Supplementary material
Source: Springer Nature journal article supplement (https://www.springermedizin.de/resource/supplementary/13011_2011_214_MOESM1_ESM.pdf/9628614)

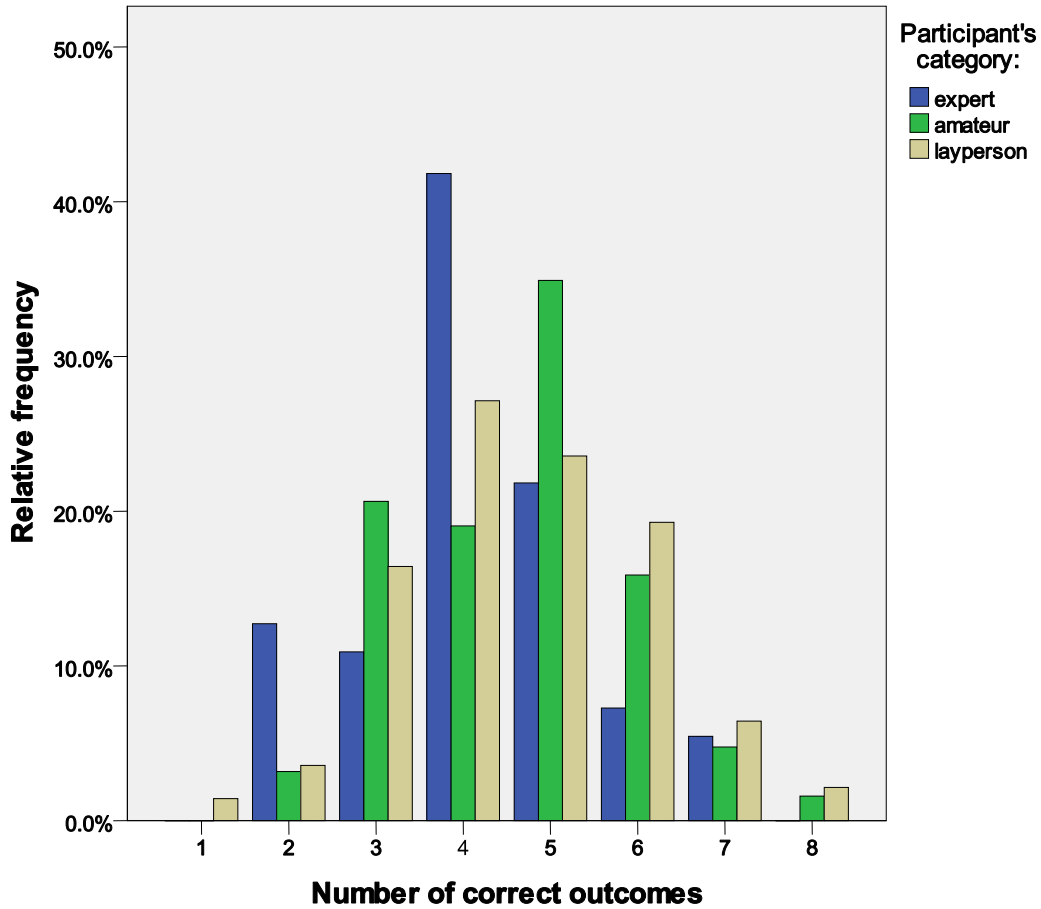

Supplement: MOESM1 [file 9628614]
